# Supplementary material for: DNA-guided CRISPR/Cas effector for programable RNA-recognition and cleavage
Source: Research Square preprint supplement (doi:10.21203/rs.3.rs-6705640/v1), 2025-06-09
Supplement: Supplementary file 2 [file edac29fbb665ecfca826089e.xlsx]

## Sheet: Sequnece information
Target system	sequence name	Sequencen (5'-3')	Fig
Target 1-related to λ phage gene	Cas9-crDNA	TAATTTGGTCCTAAGTGGACCATAAGTGGAATGCCATGTGGGC	Fig 1, B-D, Fig S2
	Cas9-crDNA-FAM	TAATTTGGTCCTAAGTGGACCATAAGTGGAATGCCATGTGGGC-FAM	Fig 3 B
	Cas9-crRNA	AAGUGGAAUGCCAUGUGGGCGUUUUAGAGCUAUGCUGUU	Fig S16
	Cas9-crRNA-FAM	FAM-AAGUGGAAUGCCAUGUGGGCGUUUUAGAGCUAUGCUGUU	Fig S16
	Cas9-tracrRNA	UUCAAAACAGCAUAGCAAGUUAAAAUAAGGCUAGUCCGUUAUCAACUUGAAAAAGUGGCACCGAGUCGGUGCUUC	Fig S16
	Cas12a-crDNA	AAGTGGAATGCCATGTGGGCTTAAAGGTGAATCCTTTATTAAT	Fig 1, A, D-F; Fig 2 B and I
	Cas12a-crDNA-FAM	FAM-AAGTGGAATGCCATGTGGGCTTAAAGGTGAATCCTTTATTAAT	Fig 2 D, H and J; Fig 3 G
	Cas12a-crDNA-PAM-mut1	AAGTGGAATGCCATGTGGGCTTCAAGGTGAATCCTTGATTAAT	Fig 2I; Fig S10A
	Cas12a-crDNA-PAM-mut1-FAM	FAM-AAGTGGAATGCCATGTGGGCTTCAAGGTGAATCCTTGATTAAT	Fig 2 E and H
	Cas12a-crDNA-PAM-mut2	AAGTGGAATGCCATGTGGGCTTCCAGGTGAATCCTGGATTAAT	Fig 2I; Fig S10B
	Cas12a-crDNA-PAM-mut2-FAM	FAM-AAGTGGAATGCCATGTGGGCTTCCAGGTGAATCCTGGATTAAT	Fig 2 F and H
	Cas12a-crDNA-PAM-mut3	AAGTGGAATGCCATGTGGGCTTCCCGGTGAATCCGGGATTAAT	Fig 2 C and I
	Cas12a-crDNA-PAM-mut3-FAM	FAM-AAGTGGAATGCCATGTGGGCTTCCCGGTGAATCCGGGATTAAT	Fig 2 G and H
	Cas12a-crDNA-FAM	FAM-AAGTGGAATGCCATGTGGGCTTAAAGGTGAATCCTTTATTAAT	Fig S17
	Cas12a-crRNA	UAAUUUCUACUAAGUGUAGAUAAGUGGAAUGCCAUGUGGGC	Fig S17
	Cas12a-crRNA-FAM	UAAUUUCUACUAAGUGUAGAUAAGUGGAAUGCCAUGUGGGC-FAM	Fig S17
	ssRNA target	GACAGCCCACAUGGCAUUCCACUUAUCACUGGCAUCCUUCCACUC	Fig 1, A, C and E; Fig 4C; Fig S2
	ssRNA target-FAM	GACAGCCCACAUGGCAUUCCACUUAUCACUGGCAUCCUUCCACUC-FAM	Fig 1, B and C; Fig 3 C and H Fig 4B Fig S16 and S17
	Cas12a-crDNA-mut-1	AAGTGGAATGCCATGTGGGGTTAAAGGTGAATCCTTTATTAAT	Fig 4D
	Cas12a-crDNA-mut-2	AAGTGGAATGCCATGTGGCCTTAAAGGTGAATCCTTTATTAAT
	Cas12a-crDNA-mut-3	AAGTGGAATGCCATGTGCGCTTAAAGGTGAATCCTTTATTAAT
	Cas12a-crDNA-mut-4	AAGTGGAATGCCATGTCGGCTTAAAGGTGAATCCTTTATTAAT
	Cas12a-crDNA-mut-5	AAGTGGAATGCCATGAGGGCTTAAAGGTGAATCCTTTATTAAT
	Cas12a-crDNA-mut-6	AAGTGGAATGCCATCTGGGCTTAAAGGTGAATCCTTTATTAAT
	Cas12a-crDNA-mut-7	AAGTGGAATGCCAAGTGGGCTTAAAGGTGAATCCTTTATTAAT
	Cas12a-crDNA-mut-8	AAGTGGAATGCCTTGTGGGCTTAAAGGTGAATCCTTTATTAAT
	Cas12a-crDNA-mut-9	AAGTGGAATGCGATGTGGGCTTAAAGGTGAATCCTTTATTAAT
	Cas12a-crDNA-mut-10	AAGTGGAATGGCATGTGGGCTTAAAGGTGAATCCTTTATTAAT
	Cas12a-crDNA-mut-11	AAGTGGAATCCCATGTGGGCTTAAAGGTGAATCCTTTATTAAT
	Cas12a-crDNA-mut-12	AAGTGGAAAGCCATGTGGGCTTAAAGGTGAATCCTTTATTAAT
	Cas12a-crDNA-mut-13	AAGTGGATTGCCATGTGGGCTTAAAGGTGAATCCTTTATTAAT
	Cas12a-crDNA-mut-14	AAGTGGTATGCCATGTGGGCTTAAAGGTGAATCCTTTATTAAT
	Cas12a-crDNA-mut-15	AAGTGCAATGCCATGTGGGCTTAAAGGTGAATCCTTTATTAAT
	Cas12a-crDNA-mut-16	AAGTCGAATGCCATGTGGGCTTAAAGGTGAATCCTTTATTAAT
	Cas12a-crDNA-mut-17	AAGAGGAATGCCATGTGGGCTTAAAGGTGAATCCTTTATTAAT
	Cas12a-crDNA-mut-18	AACTGGAATGCCATGTGGGCTTAAAGGTGAATCCTTTATTAAT
	Cas12a-crDNA-mut-19	ATGTGGAATGCCATGTGGGCTTAAAGGTGAATCCTTTATTAAT
	Cas12a-crDNA-mut-20	TAGTGGAATGCCATGTGGGCTTAAAGGTGAATCCTTTATTAAT
Taget 2- related to miRNA21	Cas9-crDNA	TAATT TGGTCC TAAGT GGACCA TACAGCCCATCGACTGGTGTT	Fig 1, D-F Fig S1
	Cas12a-crDNA	ACAGCCCATCGACTGGTGTT T TAAAG G TGAAT C CTTTA TTAAT
	ssRNA target	AACACCAGUCGAUGGGCUGU
Taget 3- related to SARS-CoV-2 gene	Cas9-crDNA	TAATT TGGTCC TAAGT GGACCA T CCGAAGGTGTGACTTCCATG	Fig 1, D-F
	Cas12a-crDNA	CCGAAGGTGTGACTTCCATG T TAAAG G TGAAT C CTTTA TTAAT
	ssRNA target	CAUGGAAGUCACACCUUCGG
Taget 4- related to SARS-CoV-2 gene	Cas9-crDNA	TAATT TGGTCC TAAGT GGACCA T CTTTGCTGCTGCTTGACAGA	Fig 1, D-F
	Cas12a-crDNA	CTTTGCTGCTGCTTGACAGATT T TAAAG G TGAAT C CTTTA TTAAT
	ssRNA target	UUC AAUCUGUCAAGCAGCAGCAAAG CAA
Taget 5- artificial sequence 1	Cas9-crDNA	TAATT TGGTCC TAAGT GGACCA T GTAGAGAGGTGAAGGAGTAA	Fig 1, D-F
	Cas12a-crDNA	GTAGAGAGGTGAAGGAGTAAGA T TAAAG G TGAAT C CTTTA TTAAT
	ssRNA target	CCAUCUUACUCCUUCACCUCUCUACUCA
Taget 6- artificial sequence 2	Cas9-crDNA	TAATT TGGTCC TAAGT GGACCA T ACAACATACACAACACACAC	Fig 1, D-F
	Cas12a-crDNA	ACAACATACACAACACACACCA T TAAAG G TGAAT C CTTTA TTAAT
	ssRNA target	CGGUGGUGUGUGUUGUGUAUGUUGUGUG
Taget 7- artificial sequence 3	Cas9-crDNA	TAATT TGGTCC TAAGT GGACCA T TGAACAAACCACCACCCACA	Fig 1, D-F
	Cas12a-crDNA	TGAACAAACCACCACCCACACC T TAAAG G TGAAT C CTTTA TTAAT
	ssRNA target	GGGGGUGUGGGUGGUGGUUUGUUCAAA
Target 8-related to EGFP gene	Cas13 crRNA	GACCACCCCAAAAAUGAAGGGGACUAAAACCAUGAUAUAGACGUUGUGGCUGUUGUAG	Fig 1, D-F Fig 5 F and G
	Cas12a crDNA	CATGATATAGACGTTGTGGC T TAAAG G TGAAT C CTTTA TTAAT
	Cas9 crDNA	TAATT TGGTCC TAAGT GGACCA T CATGATATAGACGTTGTGGC
	ssRNA target	CAACAUCCUGGGGCACAAGCUGGAGUACAACUACAACAGCCACAACGUCUAUAUCAUGGCCGACAAGCA	Fig 1, D-F
Taget 9- artificial sequence 4	DNA target	GGCCAGTGAATTCGAGCTCGGTACCCGGGGATCCTCTAGAAATATGGATTACTTGGTAGAACAGCAATCTACTCGACCTGCAGGCATGCAAGCTTGGCGTAATCATGGTCATAGCTGTTTCCTGTGTTTATCCGCTCACAATTCCACACAACATACGAGCCGGAAGCATAAAG	Fig 5 B
	RPA forward primer	AATTCTAATACGACTCACTATAGGGATCCTCTAGAAATATGGATTACTTGGTAGAACAG
	RPA reverse primer	GATAAACACAGGAAACAGCTATGACCATGATTACG
	Cas12a crDNA	AAGCTTGCATGCCTGCAGGT A GAAAGGAGCAACCTTTCATCAG
Taget 10- related to SARS-CoV-2 gene	RPA forward primer	AATTCTAATACGACTCACTATAGGGCGGCAGTCAAGCCTCTTCTCGTTCCTCATC	Fig 5 C and D
	RPA reverse primer	CAGACATTTTGCTCTCAAGCTGGTTCAATC
	Cas12a crDNA	TTGAACTGTTGCGACTACGTAGAAAGGAGCAACCTTTCATCAG
	PCR forward primer	GACCCCAAAATCAGCGAAAT
	PCR reverse primer	TCTGGTTACTGCCAGTTGAATCTG
	PCR Taqman probe	FAM-ACCCCGCATTACGTTTGGTGGACC-BHQ1
crDNA optimization with target 2 system	Linker-0	ACAGCCCATCGACTGGTGTT AGATGTGAATCATCTTTAAT	Fig S3
	Linker-1	ACAGCCCATCGACTGGTGTT TAGATGTGAATCATCTTTAAT
	Linker-2	ACAGCCCATCGACTGGTGTT T TAGATGTGAATCATCTTTAAT
	Linker-3	ACAGCCCATCGACTGGTGTT AT TAGATGTGAATCATCTTTAAT
	Linker-4	ACAGCCCATCGACTGGTGTT CAT TAGATGTGAATCATCTTTAAT
	Linker-5	ACAGCCCATCGACTGGTGTT TCAT TAGATGTGAATCATCTTTAAT
	Linker-6	ACAGCCCATCGACTGGTGTT TTCAT TAGATGTGAATCATCTTTAAT
	Overhang-0	ACAGCCCATCGACTGGTGTTTTAAAGTGAATCTTTA
	Overhang-5	ACAGCCCATCGACTGGTGTT T TAAAG TGAAT CTTTA TTAAT
	Overhang-10	ACAGCCCATCGACTGGTGTTTTAAAGTGAATCTTTA TTAAT TGTGT
	Overhang-15	ACAGCCCATCGACTGGTGTTTTAAAGTGAATCTTTA TTAAT TGTGTGTGTG
	Overhang-25	ACAGCCCATCGACTGGTGTTTTAAAGTGAATCTTTA TTAAT TGTGTGTGTGGTTGTGTTGG
	Overhang-ds20	ACAGCCCATCGACTGGTGTT TTAAAGTGAATCTTTA AAACACCAGTCGATGGGCTGT
	Stem-4	ACAGCCCATCGACTGGTGTT T TAAA TGAAT TTTA TTAAT
	Stem-5	ACAGCCCATCGACTGGTGTT T TAAAG TGAAT CTTTA TTAAT
	Stem-6	ACAGCCCATCGACTGGTGTT T TAAAG G TGAAT C CTTTA TTAAT
	Stem-7	ACAGCCCATCGACTGGTGTT T TAAAG GC TGAAT GC CTTTA TTAAT
	Stem-8	ACAGCCCATCGACTGGTGTT T TAAAG GCG TGAAT CGC CTTTA TTAAT
	Stem-9	ACAGCCCATCGACTGGTGTT T TAAAG GCGG TGAAT CCGC CTTTA TTAAT
	Stem-10	ACAGCCCATCGACTGGTGTT T TAAAG GCGGC TGAAT GCCGC CTTTA TTAAT
	Bubble-4	ACAGCCCATCGACTGGTGTT T TAAAG G TGAT C CTTTA TTAAT
	Bubble-5	ACAGCCCATCGACTGGTGTT T TAAAG G TGAAT C CTTTA TTAAT
	Bubble-6	ACAGCCCATCGACTGGTGTT T TAAAG G TGAGAT C CTTTA TTAAT
	Bubble-7	ACAGCCCATCGACTGGTGTT T TAAAG G TGAGTAT C CTTTA TTAAT
	Bubble-8	ACAGCCCATCGACTGGTGTT T TAAAG G TGAGTTAT C CTTTA TTAAT
	Bubble-9	ACAGCCCATCGACTGGTGTT T TAAAG G TGAGTTGAT C CTTTA TTAAT
	Bubble-10	ACAGCCCATCGACTGGTGTT T TAAAG G TGAGTTGGAT C CTTTA TTAAT
	Spacer-14	CATCGACTGGTGTT T TAAAG G TGAAT C CTTTA TTAAT
	Spacer-16	CCCATCGACTGGTGTT T TAAAG G TGAAT C CTTTA TTAAT
	Spacer-18	AGCCCATCGACTGGTGTT T TAAAG GTGAAT C CTTTA TTAAT
	Spacer-20	ACAGCCCATCGACTGGTGTT T TAAAG G TGAAT C CTTTA TTAAT
	Spacer-22	TTACAGCCCATCGACTGGTGTT T TAAAG G TGAAT C CTTTA TTAAT
	Spacer-24	GTTTACAGCCCATCGACTGGTGTT T TAAAG G TGAAT C CTTTA TTAAT
	Spacer-26	GTGTTTACAGCCCATCGACTGGTGTT T TAAAG G TGAAT C CTTTA TTAAT
	Spacer-28	ATGTGTTTACAGCCCATCGACTGGTGTT T TAAAG G TGAAT C CTTTA TTAAT
	Spacer-30	TTATGTGTTTACAGCCCATCGACTGGTGTT T TAAAG G TGAAT C CTTTA TTAAT
